# Supplementary material for: The theoretical prediction of the structural characteristics and SO2 adsorption-sensing properties of pristine HfS2 and TM-doped HfS2 monolayers (TM = Ni, Pd, or Pt)
Source: Royal Society of Chemistry journal article supplement (doi:10.1039/d3nj01053h), 2023-01-01
Supplement: d3nj01053h1.pdf [file d3nj01053h1.pdf]

## Supplementary Information for "Theoretical prediction of structural characteristics and SO<sub>2</sub> adsorption-sensing properties of the pristine HfS<sub>2</sub> and TM-doped HfS<sub>2</sub> monolayers (TM = Ni, Pd, or Pt)"

Tuan V. Vu<sup>1,2</sup>, Khang D. Pham<sup>3,\*</sup>

<sup>1</sup>Laboratory for Computational Physics, Institute for Computational Science and Artificial Intelligence, Van Lang University, Ho Chi Minh City, Vietnam

<sup>2</sup>Faculty of Mechanical - Electrical and Computer Engineering, School of Technology, Van Lang University, Ho Chi Minh City, Vietnam

<sup>3</sup>Military Institute of Mechanical Engineering, Hanoi, Vietnam

(Dated: August 11, 2023)

TABLE S1: The convergence test of the total energy of the  $3 \times 3$  - dimensional HfS<sub>2</sub> supercell in the K-points grid dependence. The calculated total energy using the k-points grid of  $5 \times 5 \times 1$  and the cutoff energy of 500 eV reaches the convergence of  $10^{-4}$  eV, indicating that these parameters are sufficient to obtain reliable results.

| Kpoint grid | Total energy (eV) |
|-------------|-------------------|
| 3 x 3 x 1   | -209.57658        |
| 4 x 4 x 1   | -209.58383        |
| 5 x 5 x 1   | -209.58354        |
| 6 x 6 x 1   | -209.58357        |
| 7 x 7 x 1   | -209.58356        |
| 8 x 8 x 1   | -209.58358        |

TABLE S2: The calculated total energies and the currents flowing through the sensor device based on the Pt-doped HfS<sub>2</sub> monolayer at the bias voltage of 10 mV using the TRANSIESTA code in dependence on the K-points grid. The cutoff energy was set to 300 Ry.

| K-point grid | Total energy (eV) | Current ( $\mu$ A) |
|--------------|-------------------|--------------------|
| 20 x 1 x 1   | -152436.8689      | 1.4105             |
| 40 x 1 x 1   | -152436.8703      | 1.4102             |
| 60 x 1 x 1   | -152436.8639      | 1.4103             |
| 80 x 1 x 1   | -152436.8643      | 1.4102             |
| 100 x 1 x 1  | -152436.8637      | 1.4103             |

TABLE S3: The calculated total energies and the currents flowing through the sensor device based on the Pt-doped HfS<sub>2</sub> monolayer at the bias voltage of 10 mV using the TRANSIESTA code in dependence on the cutoff energy. K-points grid was set to 300 Ry. The calculated currents using the k-points grid of 100 x 1 x 1 and the cutoff energy of 300 Ry reaches the convergence of approximately 10<sup>-4</sup> eV, indicating that these parameters are sufficient to obtain reliable results in the TRANSIESTA calculations.

| Cutoff energy (Ry) | Total energy (eV) | Current ( $\mu$ A) |
|--------------------|-------------------|--------------------|
| 100                | -152437.5841      | 1.4128             |
| 150                | -152437.1072      | 1.4109             |
| 200                | -152436.9428      | 1.4115             |
| 250                | -152436.9106      | 1.4107             |
| 300                | -152436.8637      | 1.4103             |
| 350                | -152436.8488      | 1.4105             |

TABLE S4: The calculated total energies of the TM-doped HfS<sub>2</sub> monolayer (TM=Ni, Pd, or Pt). The smallest values in bold indicate total energies of the most stable configurations for Ni-, Pd- and Pt-doping on the HfS<sub>2</sub> monolayer. The position symbols (A, B, C) are explained on Figure S2.

| TM-adatom | Positions | The total energies (eV) |
|-----------|-----------|-------------------------|
| Ni        | A         | -211.9433               |
|           | B         | -214.1521               |
|           | C         | <b>-214.7490</b>        |
| Pd        | A         | -212.8092               |
|           | B         | -213.9851               |
|           | C         | <b>-214.3944</b>        |
| Pt        | A         | -212.4810               |
|           | B         | -214.1271               |
|           | C         | <b>-214.7131</b>        |

TABLE S5: The calculated adsorption energies of SO<sub>2</sub> monomolecule on the TM-doped HfS<sub>2</sub> monolayer (TM=Ni, Pd, Pt). The smallest values in bold indicate adsorption energies of the most stable adsorption configurations of SO<sub>2</sub> molecule on the Ni-, Pd- and Pt-doped HfS<sub>2</sub> monolayer, respectively. H, V<sub>1</sub>, and V<sub>2</sub> show the initial orientation of the SO<sub>2</sub> molecule in structural optimizations, which corresponds to horizontal orientation and vertical orientations, with atom S below and atom S above.

| Orientations   | The adsorption energies on TM-doped HfS <sub>2</sub> monolayer (eV) |               |               |
|----------------|---------------------------------------------------------------------|---------------|---------------|
|                | Ni-doped                                                            | Pd-doped      | Pt-doped      |
| H              | -0.845                                                              | -0.753        | -0.825        |
| V <sub>1</sub> | <b>-0.847</b>                                                       | <b>-0.758</b> | <b>-0.826</b> |
| V <sub>2</sub> | -0.426                                                              | -0.501        | -0.459        |

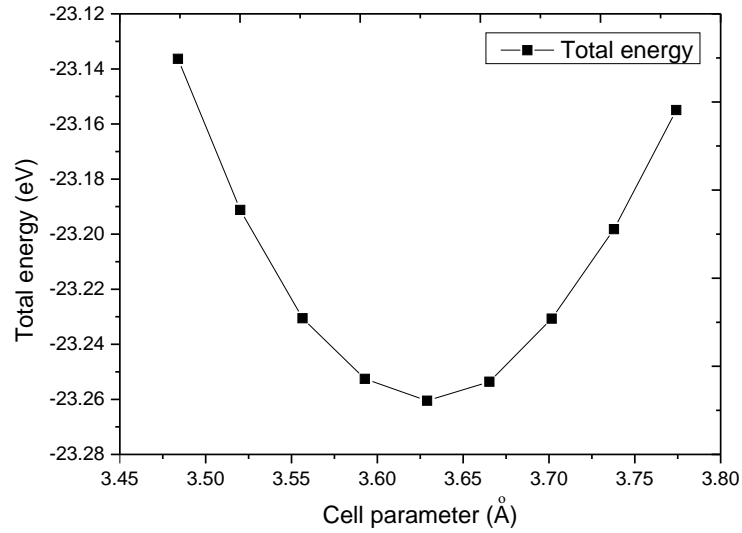

FIG. S1: The dependence of the total energy of the relaxed unit-cell  $\text{HfS}_2$  monolayer on the assumed cell parameter. The lowest total energy achieves at  $a = 3.63 \text{ \AA}$ , indicating this value is the optimized cell parameter of the  $\text{HfS}_2$  monolayer.

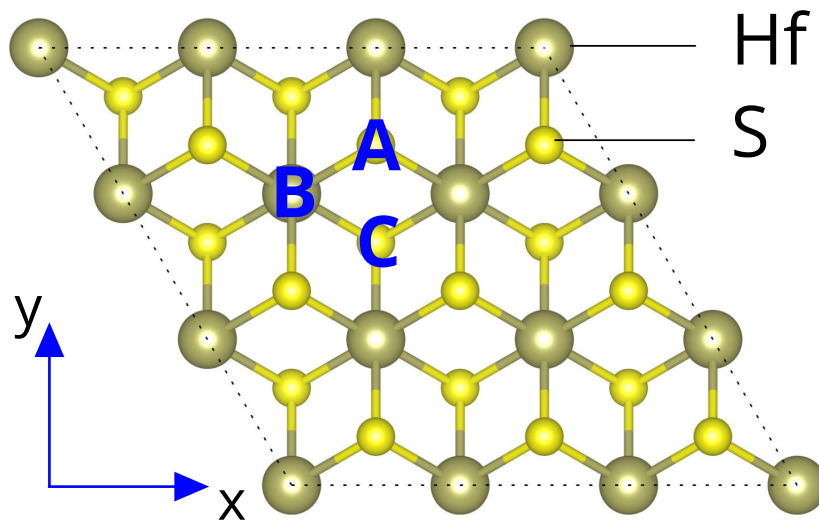

FIG. S2: Doping positions of TM-atoms on the  $\text{HfS}_2$  monolayer (TM= Ni, Pd, or Pt). A, B and C are the upper position of the S atom in the top layer, the upper position of the Hf atom and the hollow position, respectively.
